# Supplementary material
Source: PubMed Central journal article supplement (PMC2518623)
Supplement: NIHMS61057-supplement-si20060302_114.pdf [file NIHMS61057-supplement-si20060302_114.pdf]

**A Gene Cluster for Biosynthesis of the  
Sesquiterpenoid Antibiotic Pentalenolactone in  
*Streptomyces avermitilis*<sup>†</sup>**

*Charles N. Tetzlaff,<sup>‡</sup> Zheng You,<sup>‡</sup> David E. Cane,<sup>‡\*</sup> Satoshi Takamatsu,<sup>§</sup> Satoshi  
Omura,<sup>‡</sup> and Haruo Ikeda<sup>§</sup>*

<sup>‡</sup> Department of Chemistry, Box H, Brown University, Providence, RI 02912-  
9108, USA

<sup>§</sup> Kitasato Institute for Life Sciences, Kitasato University, 1-151-1, Kitasato,  
Sagamihara,  
Kanagawa 228-8555, Japan

<sup>‡</sup> The Kitasato Institute, 9-1, Shirokane 5-chome, Minato-ku, Tokyo 108-8642,  
Japan

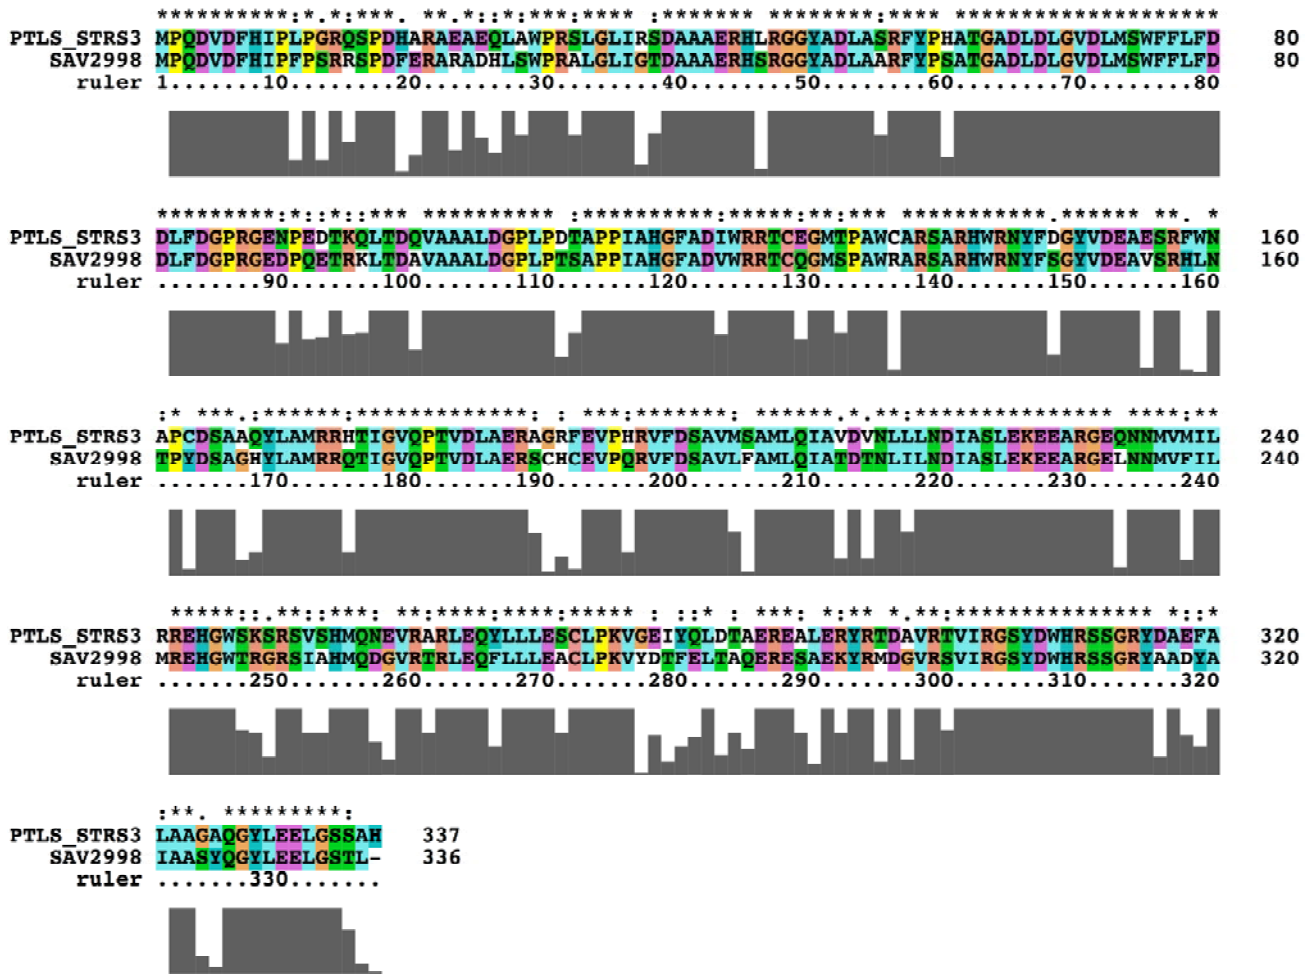

Figure S1. Sequence alignment (ClustalW) of *S. avermitilis* pentalenene synthase (PtlA, SAV2998) with pentalenene synthase of *Streptomyces* sp. UC5319 (gi: 2833457, sp: Q55012, PTL5\_STRS3).



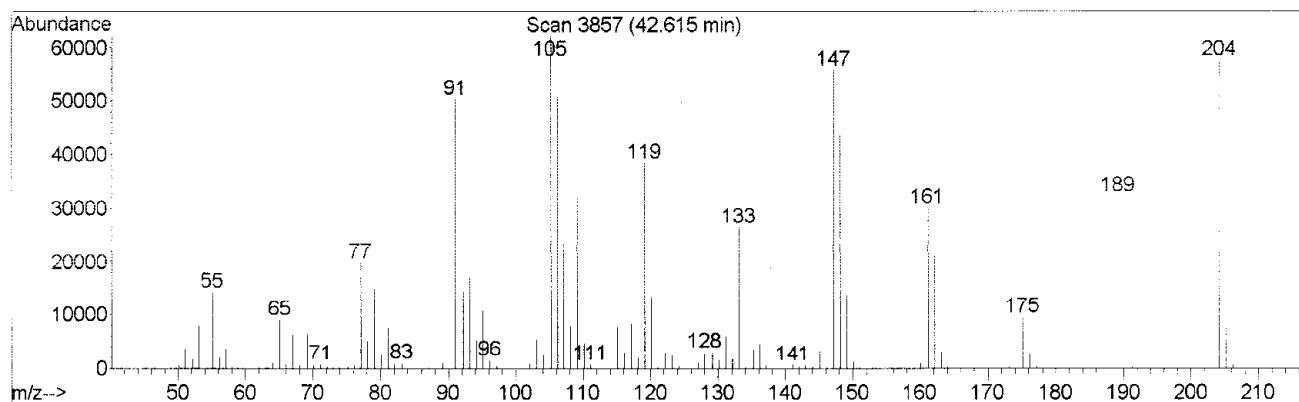

**Figure S3.** Mass spectrum of pentalenene (**3**) generated by incubation of farnesyl diphosphate with *S. avermitilis* pentalenene synthase. GC-MS was performed using a chiral 25 m x 0.25 mm hydrodex- $\beta$ -6-TBDM column (Macherey-Nagel) with a temperature ramp of 45 °C to 180 °C at 2 °C/min and an inlet temperature of 150 °C.
